# Supplementary material for: Ternary 3D architectures of CdS QDs/graphene/ZnIn2S4 heterostructures for efficient photocatalytic H2 production
Source: Royal Society of Chemistry journal article supplement (doi:10.1039/c3cp51857d), 2013-01-01
Supplement: c3cp51857d.pdf [file c3cp51857d.pdf]

# Supporting Information

## **Ternary 3D Architectures of CdS QDs/Graphene/ZnIn<sub>2</sub>S<sub>4</sub> Heterostructures for Efficient Photocatalytic H<sub>2</sub> Production**

Jungang Hou, Chao Yang, Huijie Cheng, Zheng Wang, Shuqiang Jiao,\* Hongmin Zhu

School of Metallurgical and Ecological Engineering, University of Science and Technology Beijing, Beijing  
100083, China

Corresponding author: [sjiao@ustb.edu.cn](mailto:sjiao@ustb.edu.cn)

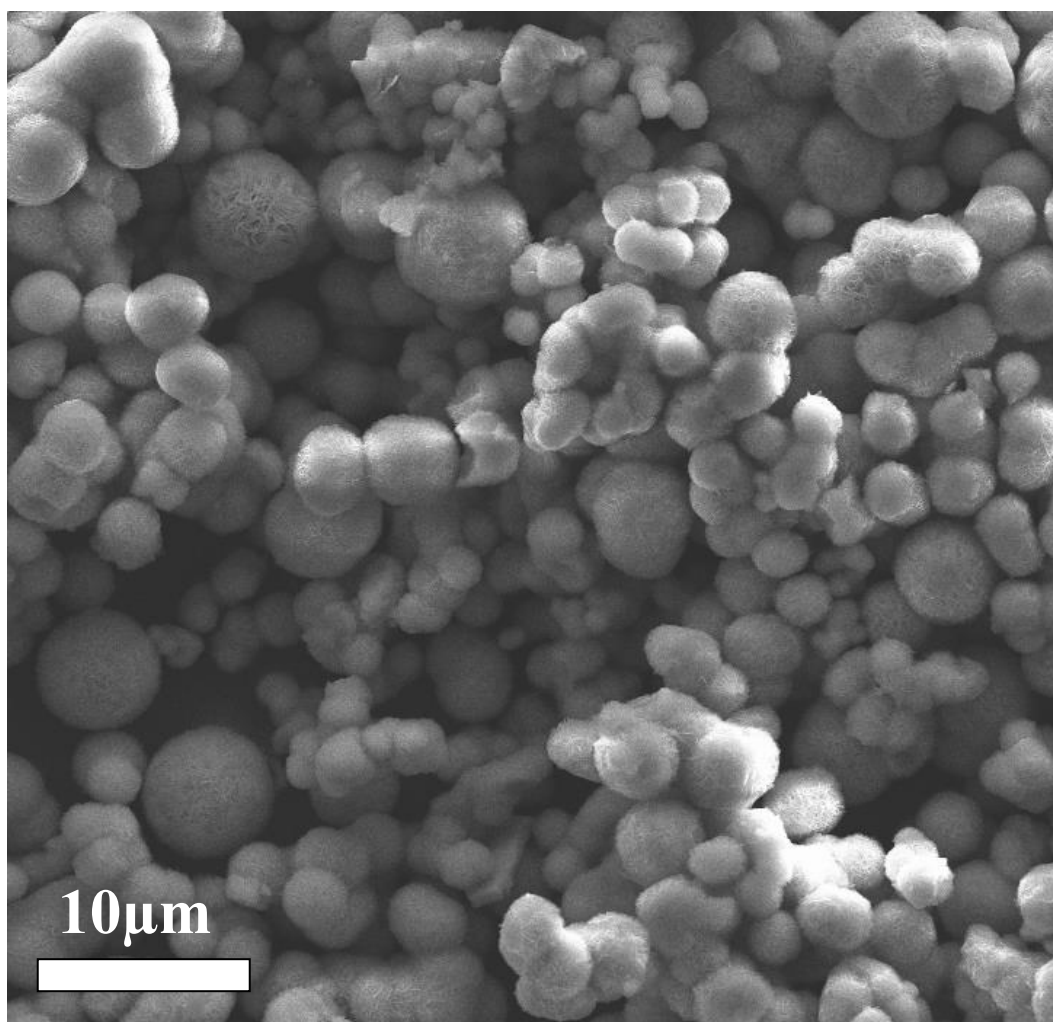

**Fig. S1. The SEM image from a surface area of the 3mol% CdS QDs decorated  $\text{ZnIn}_2\text{S}_4$  heterostructures.**

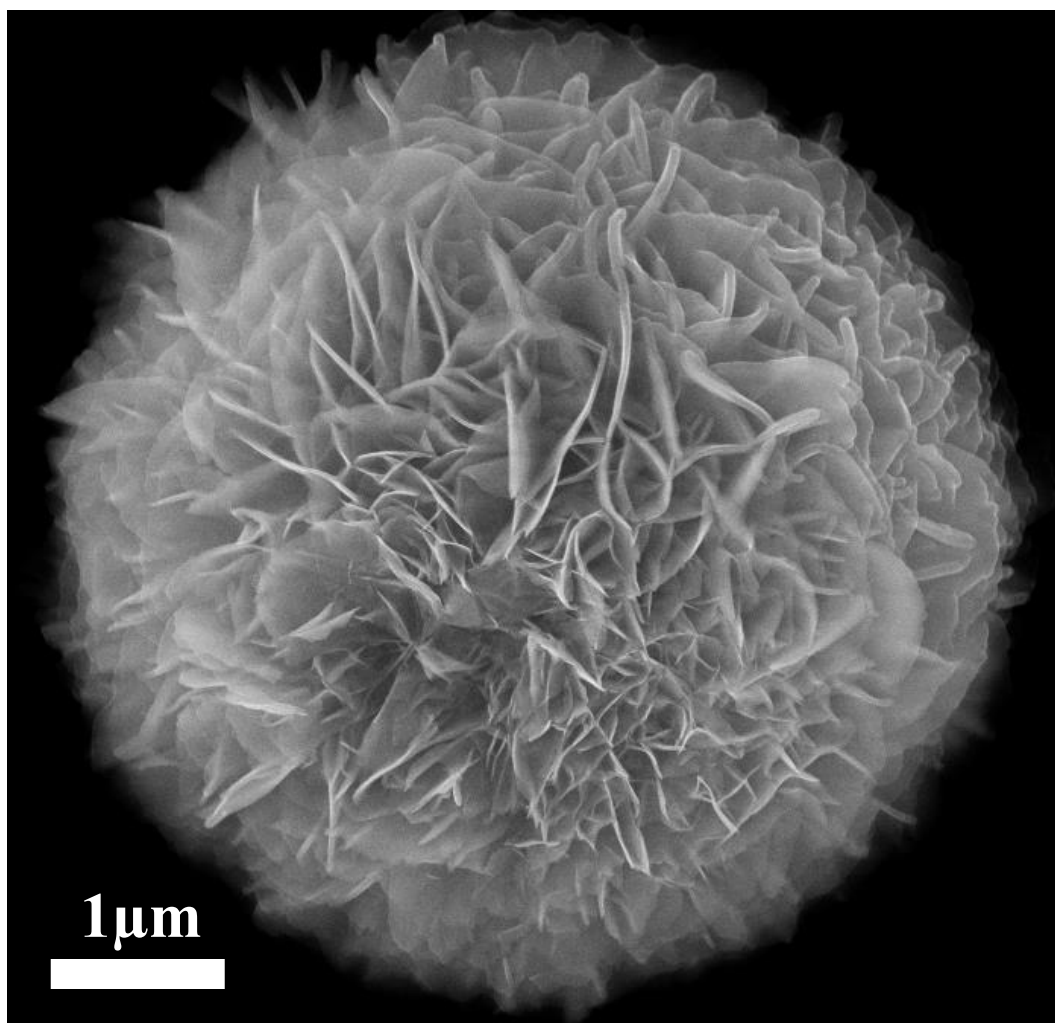

**Fig. S2. The SEM image from a surface area of the 3mol% CdS QDs decorated  $\text{ZnIn}_2\text{S}_4$  heterostructure.**

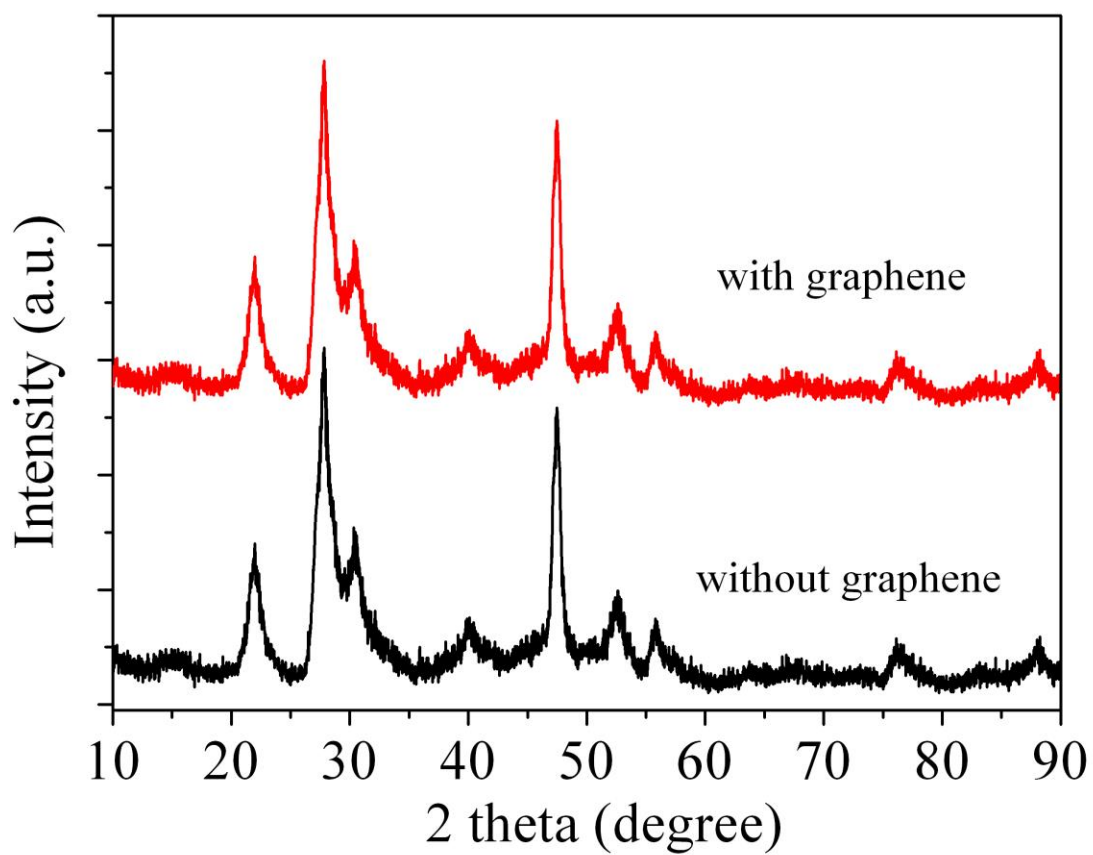

**Fig. S3.** The XRD patterns of the as-prepared 3wt% CdS QDs decorated  $\text{ZnIn}_2\text{S}_4$  composites coupled with and without 1wt% graphene.
